# Supplementary material for: (E)-5-Styryl-1H-indole and (E)-6-Styrylquinoline Derivatives Serve as Probes for β-Amyloid Plaques
Source: Molecules. 2012 Apr 10;17(4):4252–65. doi: 10.3390/molecules17044252 (PMC6268995; doi:10.3390/molecules17044252)

## Supplemental Material

### Purity of (*E*)-5-Styryl-1*H*-indole and (*E*)-6-Styrylquinoline Derivatives together with HPLC Chromatograms

UV-wavelength: 254 nm

Alltech Alltima RPC-18 column (5  $\mu$ m, ID = 4.6 mm, length = 250 mm)

| Compounds | Flow rate (mL/min) | Mobile phase (CH <sub>3</sub> CN/H <sub>2</sub> O, v/v) | Retention time (min) | Purity (%) |
|-----------|--------------------|---------------------------------------------------------|----------------------|------------|
| 4         | 1                  | 70/30                                                   | 9.793                | 100%       |
| 5         | 1                  | 70/30                                                   | 10.526               | 99.89%     |
| 6         | 1                  | 70/30                                                   | 15.957               | 99.05%     |
| 7         | 1                  | 70/30                                                   | 18.033               | 98.74%     |
| 8         | 1                  | 70/30                                                   | 20.316               | 96.39%     |
| 9         | 1                  | 70/30                                                   | 14.129               | 98.94%     |
| 10        | 1                  | 70/30                                                   | 10.214               | 98.51%     |
| 14        | 1                  | 90/10                                                   | 10.060               | 97.41%     |
| 15        | 1                  | 90/10                                                   | 15.706               | 99.81%     |
| 16        | 1                  | 90/10                                                   | 16.316               | 97.06%     |
| 17        | 1                  | 90/10                                                   | 19.550               | 95.71%     |
| 18        | 1                  | 90/10                                                   | 15.481               | 99.32%     |

#### Compound 4

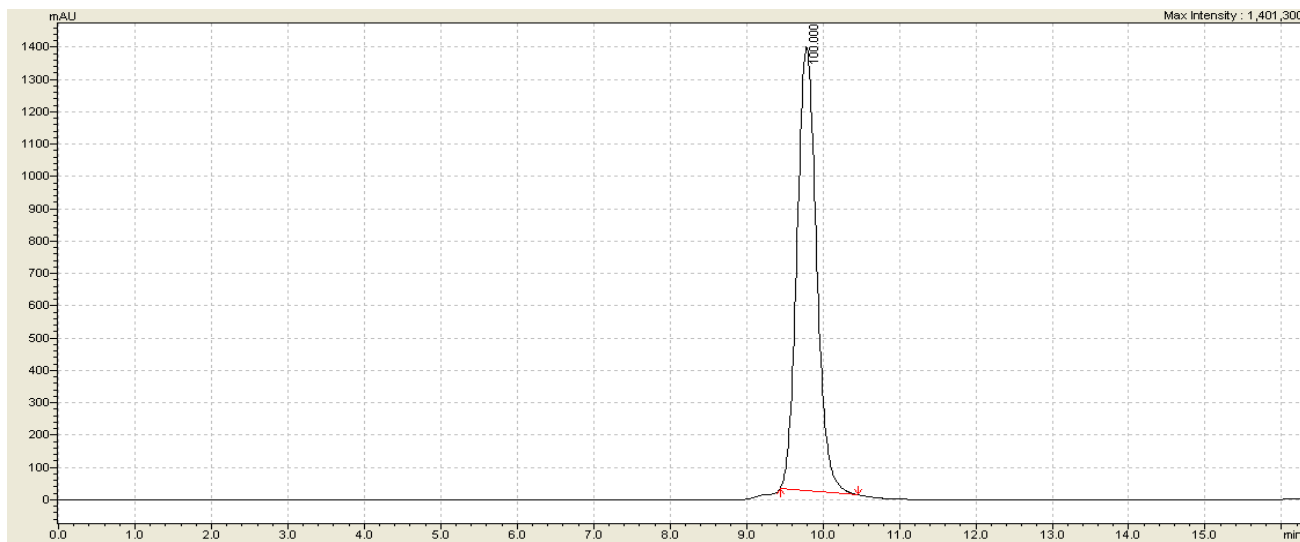

**Compound 5**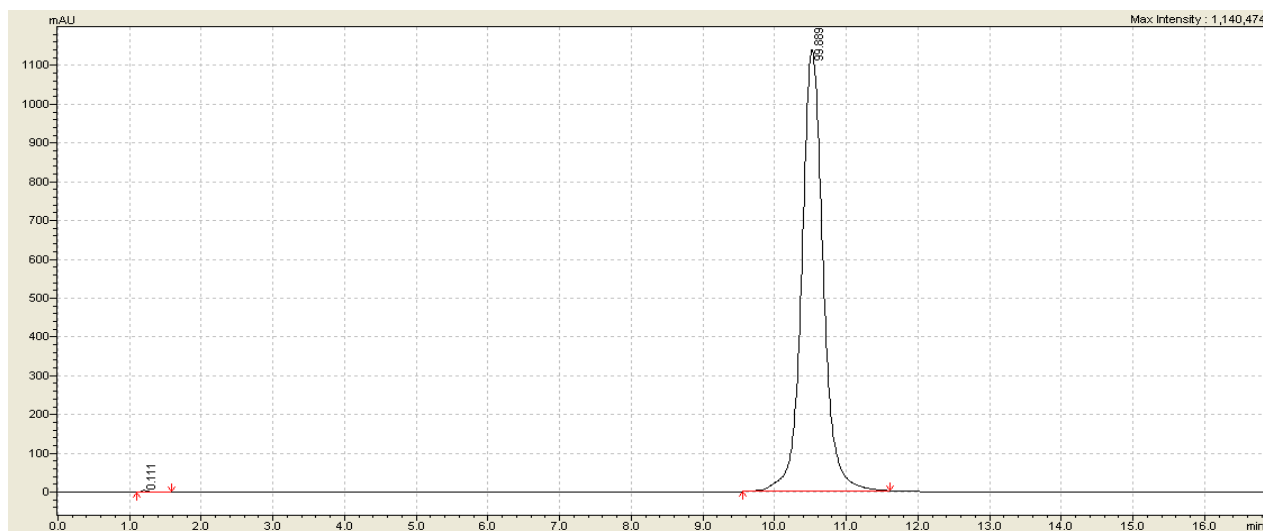**Compound 6**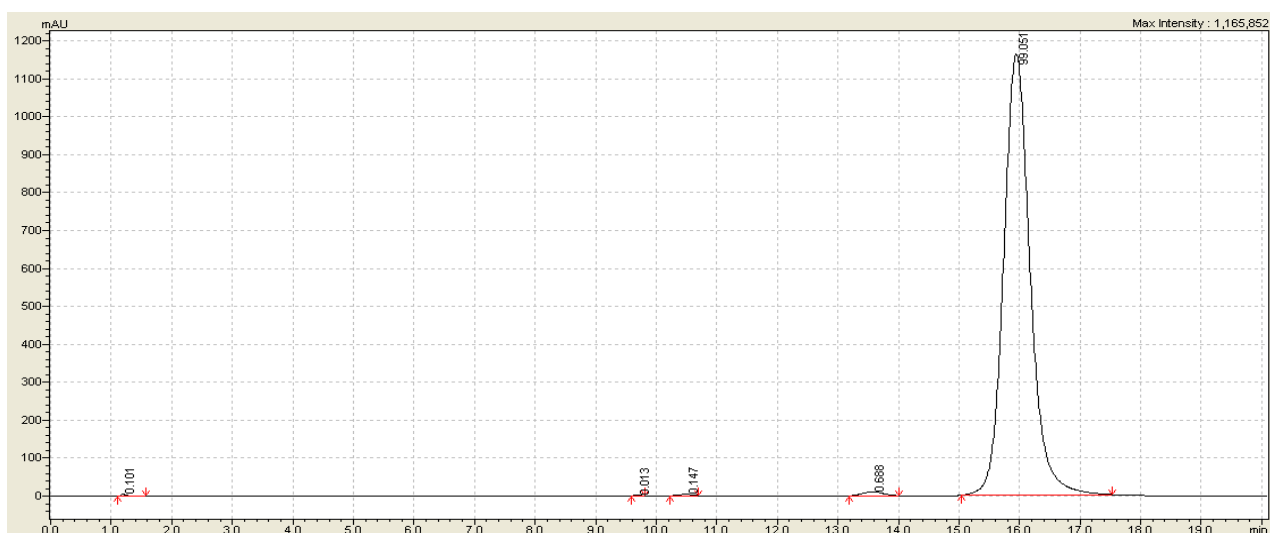**Compound 7**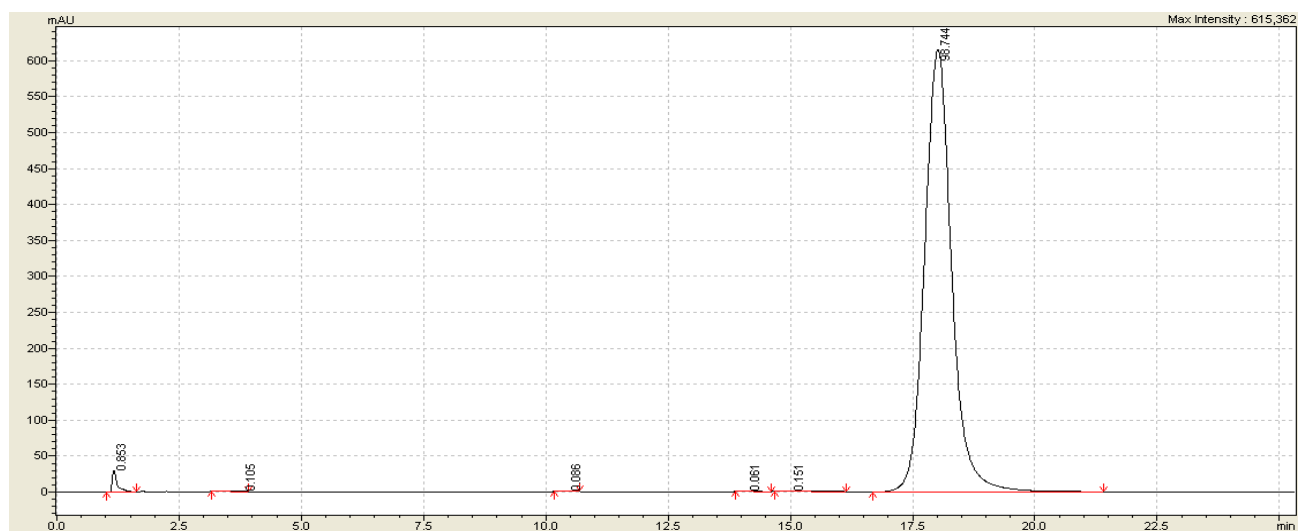

**Compound 8**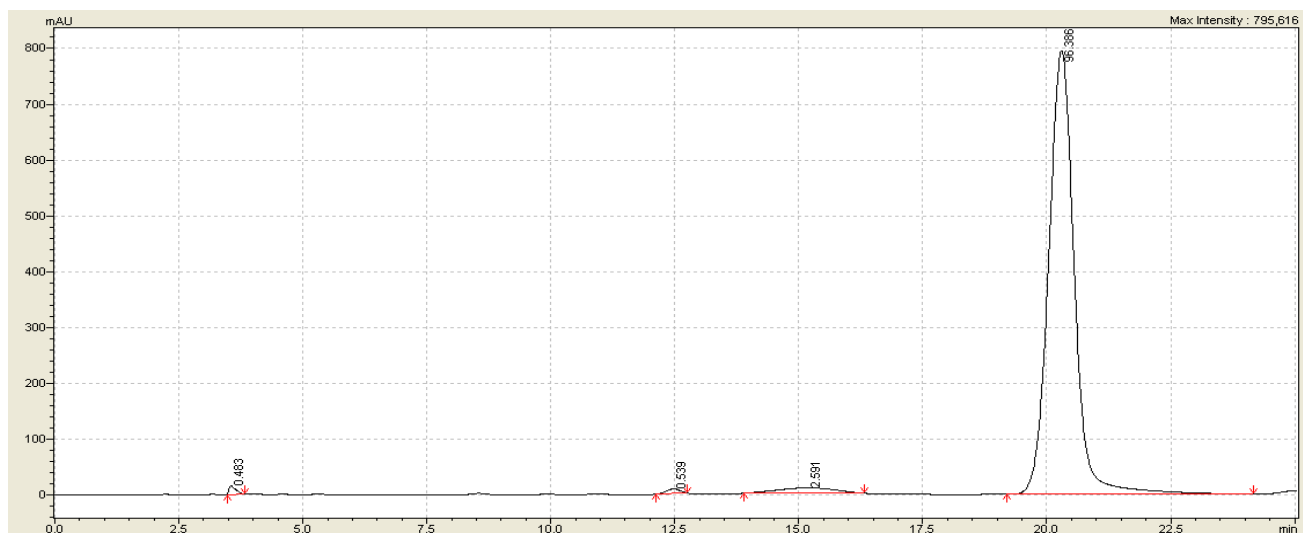**Compound 9**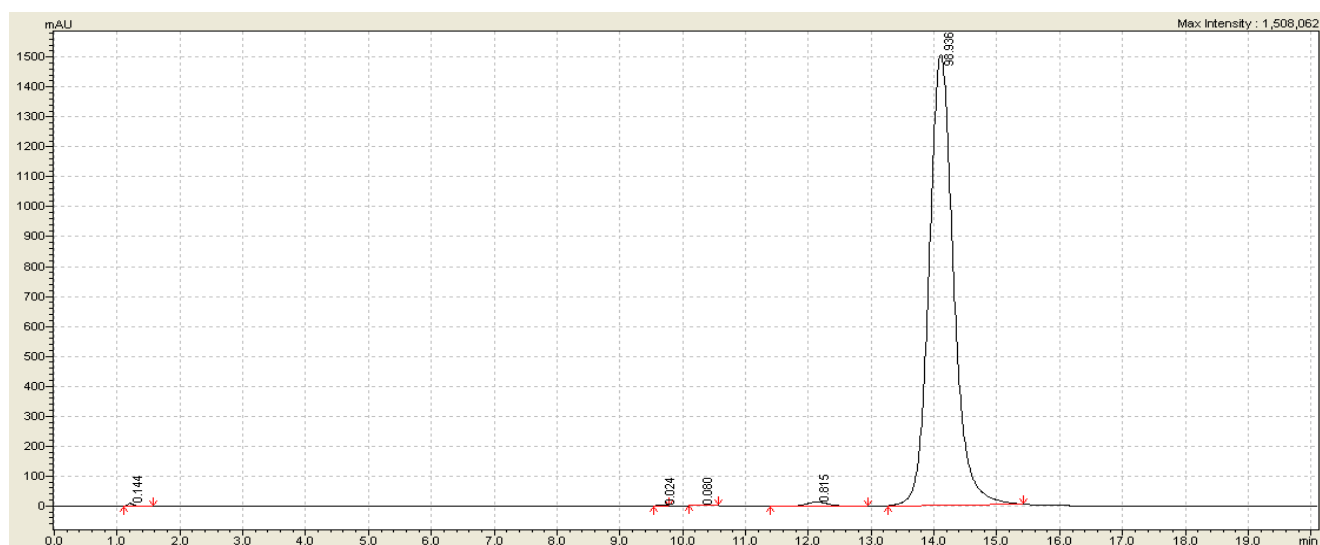**Compound 10**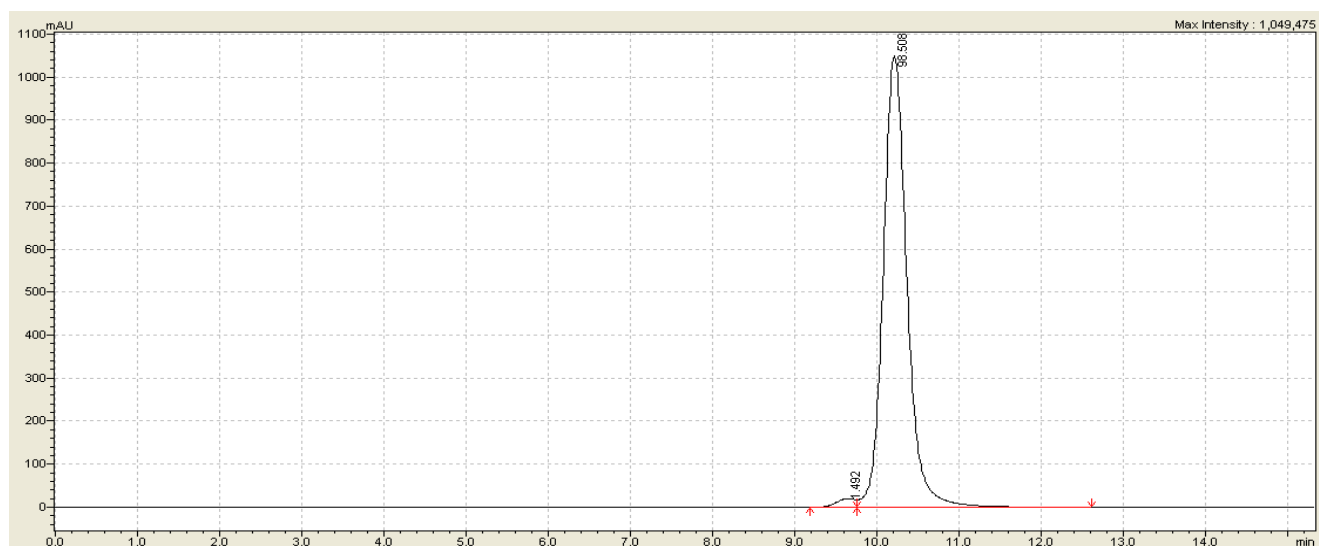

## Compound 14

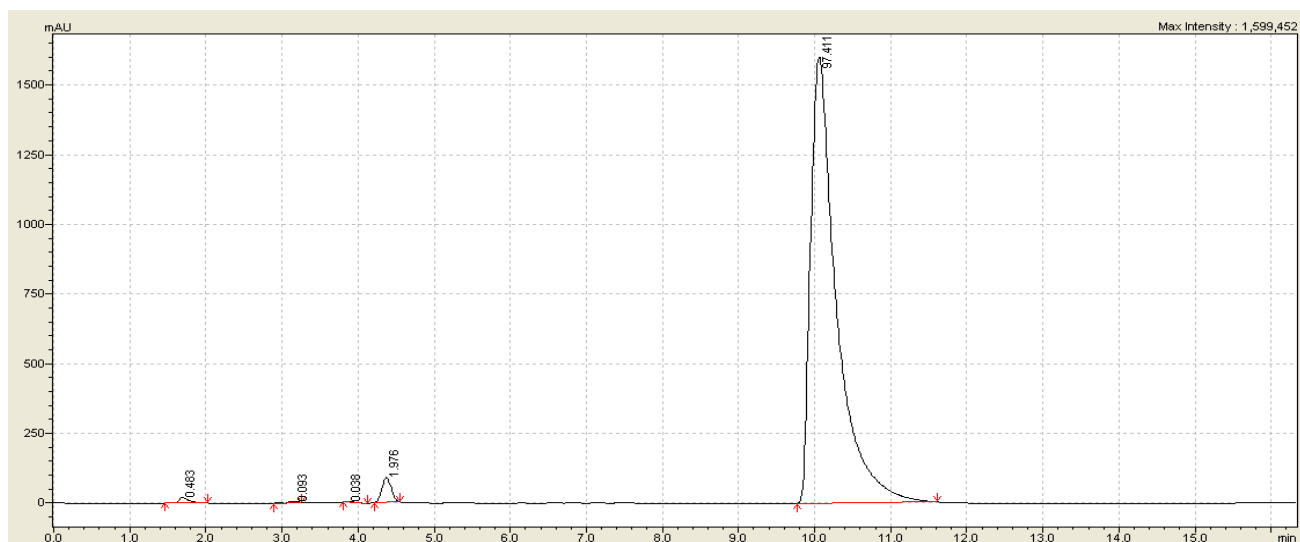

## Compound 15

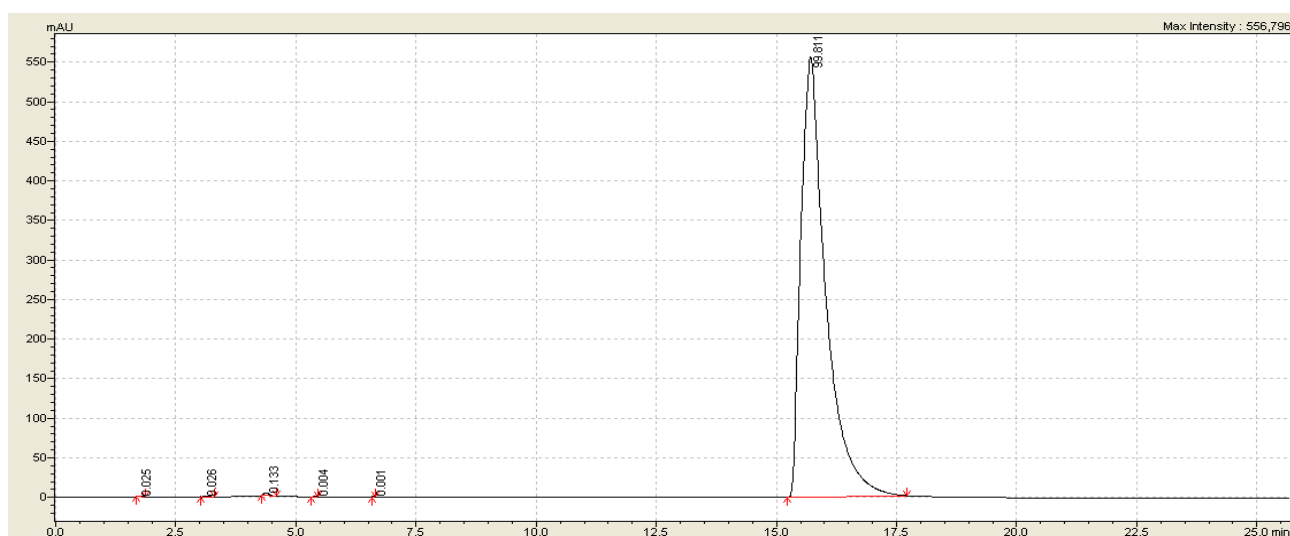

## Compound 16

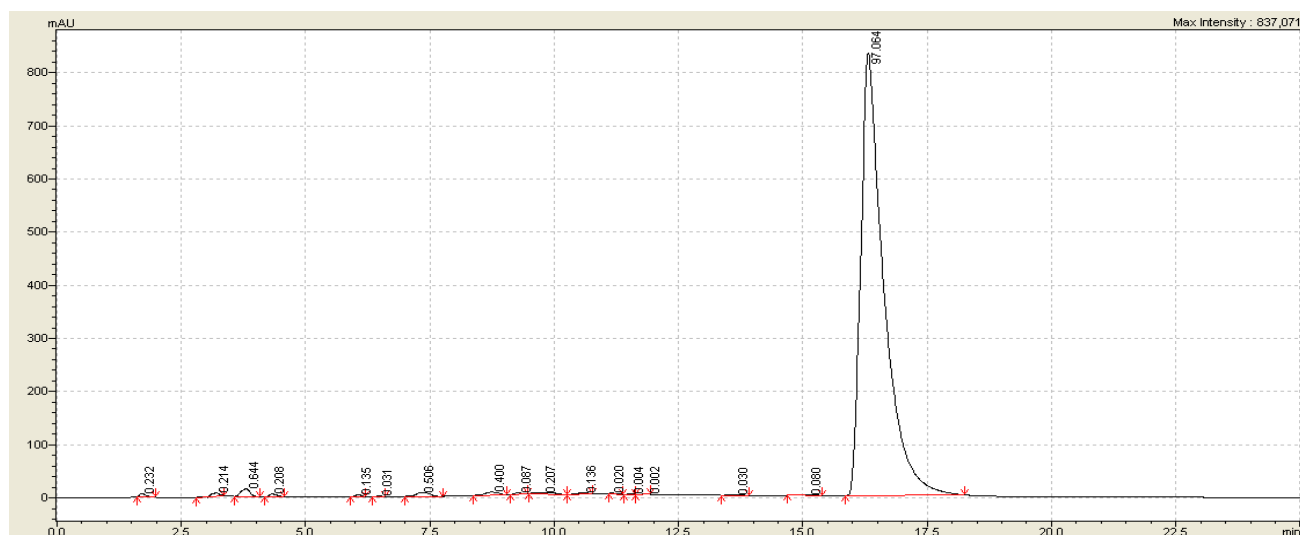

## Compound 17

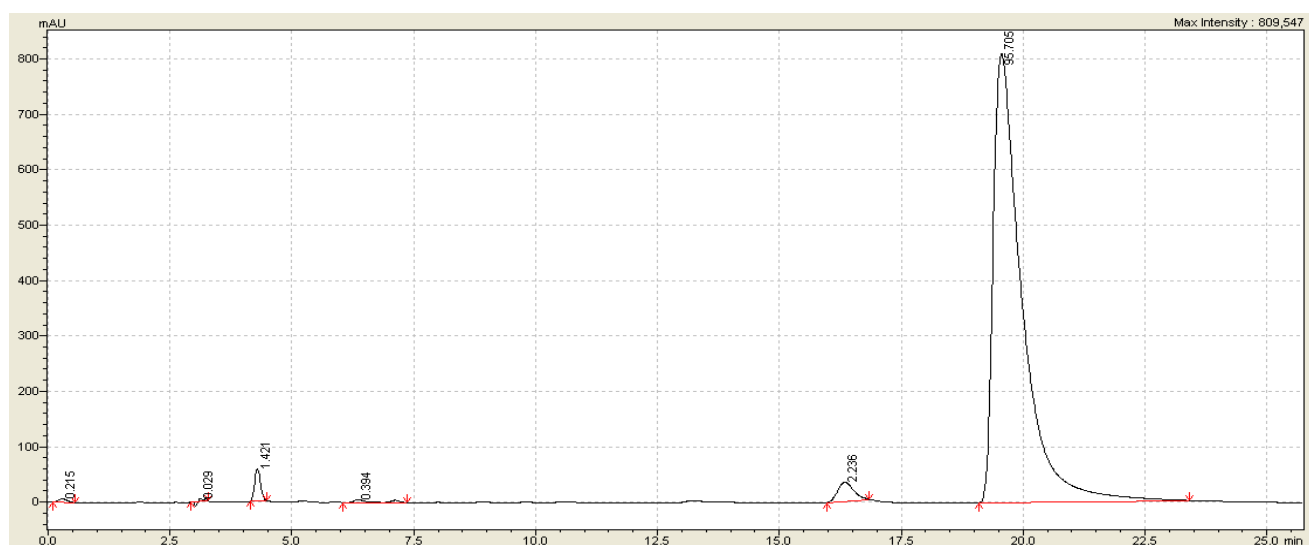

## Compound 18

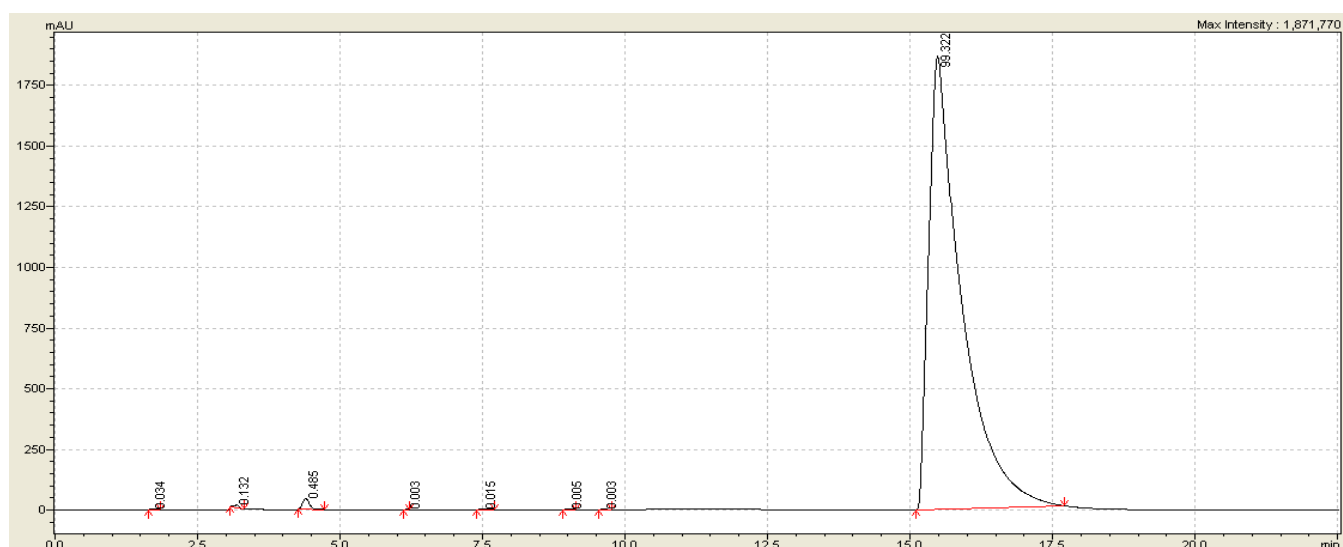

Supplement: Supplementary file 1 [file molecules-17-04252-s001.pdf]
